# Supplementary material
Source: Springer Nature journal article supplement (https://www.springermedizin.de/resource/supplementary/12933_2012_514_MOESM4_ESM.pdf/9538392)

# ROC Curve for Cardiac Mortality

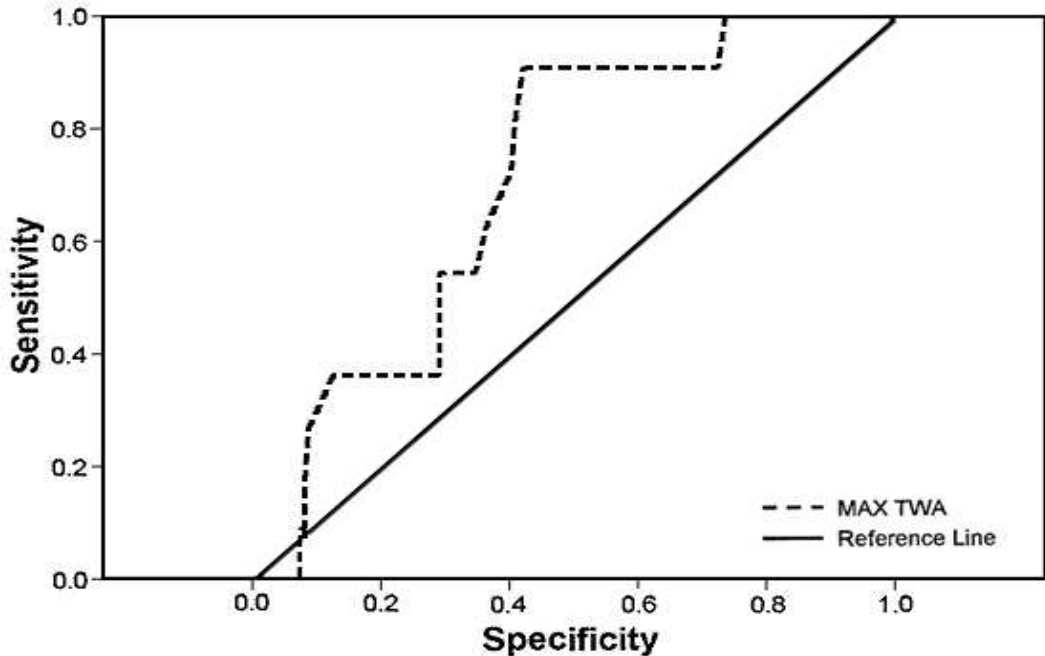

Supplement: MOESM4 [file 9538392]
